# Supplementary material for: HDAC2 Inhibitor Valproic Acid Increases Radiation Sensitivity of Drug-Resistant Melanoma Cells
Source: PubMed Central journal article supplement (PMC6473314; doi:10.3390/medsci7030051), 2019-03-22
Supplement: medsci-07-00051-s001.pdf [file medsci-07-00051-s001.pdf]

**Supplementary Materials**
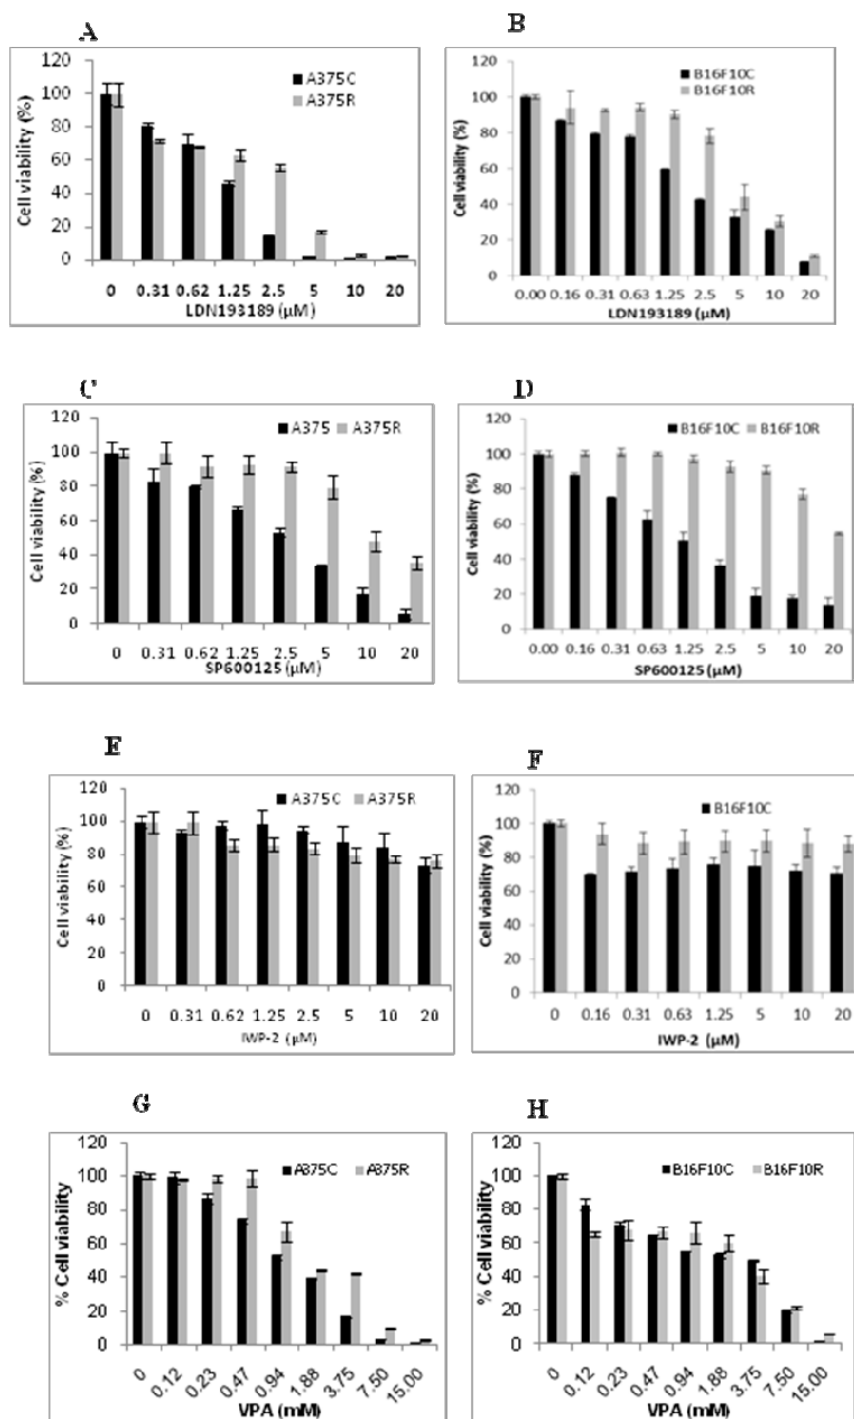

**Figure 1.** Cytotoxic effect of LDN193189, SP600125 IWP-2, and VPA on A375 and B16F10 cell lines. The drug concentration ranges were 0.3–20 µM for LDN193189, SP600125 and IWP2 and 0.1–15 mM for VPA. A graph was plotted with concentration of the drug (X-axis) vs. cell viability % (Y-axis) and the IC<sub>50</sub> values were calculated using the formula  $y = b + ax$ . Data shown are means ± SEM of three replicate wells. An IC<sub>50</sub> value is the concentration of the drug which results in 50% cell death. The dark bars represent naïve parental cell lines (A375C or B16F10C) and the light grey bars represent drug resistant sublines (A375R or B16F10R).

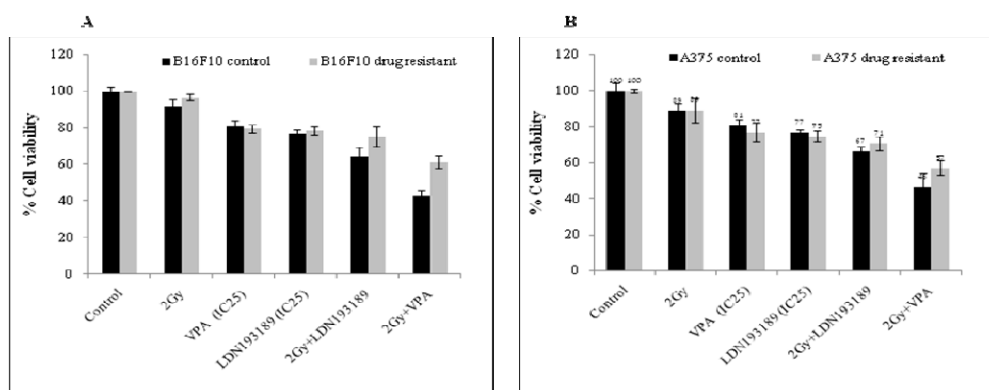

**Figure S2.** Radiation sensitization effects of VPA and LDN193189 on A375 and B16F10 cell lines. A375 and B16F10 cells, both parental and resistant, were pre-treated with IC<sub>25</sub> dose of VPA or LDN193189. After 24 h of incubation, the flask containing cells were irradiated with a gamma radiation (GC-5000, BRIT Mumbai, India) at the CARRT, Mangalore University, at a dose rate of 8.8 Gy/min for 14 s (equivalent to 2 Gy) at room temperature. After irradiation, cells were incubated further for 24 h with drugs and MTT assay was performed. Respective sham irradiation and control groups were used for comparison and data shown are mean  $\pm$  SEM of three replicate wells. The results of MTT assay: **(A)** human melanoma A375 and **(B)** mouse melanoma B16F10; control (dark bars) and resistant (light bars).
